# Supplementary material for: Ancient segmentally duplicated LCORL retrocopies in equids
Source: PLoS One. 2023 Jun 8;18(6):e0286861. doi: 10.1371/journal.pone.0286861 (PMC10249811; doi:10.1371/journal.pone.0286861)
Supplement: S1 Table — (XLSX) [file pone.0286861.s011.xlsx]

## Sheet: Sheet1
S1 Table: Study dataset.
Run	BioSample	Bioproject	Breed	Species	Sex	Average coverage	RetroCNV total
ERR2179542	SAMEA104357337	PRJEB14779	German Riding Pony	E. caballus	female	28.305	25
ERR2179552	SAMEA104357347	PRJEB14779	Noriker	E. caballus	male	9.02614	15
ERR2179553	SAMEA104357348	PRJEB14779	Haflinger	E. caballus	male	23.697	30
ERR2179554	SAMEA104357349	PRJEB14779	Haflinger	E. caballus	female	27.5709	27
ERR2179555	SAMEA104357350	PRJEB14779	Haflinger	E. caballus	male	22.2731	29
ERR2179556	SAMEA104357351	PRJEB14779	Swiss Warmblood	E. caballus	male	24.7054	23
ERR2203766	SAMEA104399644	PRJEB14779	Trakehner	E. caballus	female	25.5852	24
ERR2286908	SAMEA104569895	PRJEB24845	Donkey	E. asinus	male	29.9621	61
ERR2576791-ERR2576792	SAMEA104728790	PRJEB26698	Thoroughbred	E. caballus	female	20.8832	18
ERR2576789-ERR2576790	SAMEA104728842	PRJEB26698	Thoroughbred	E. caballus	female	20.0488	23
ERS559290	SAMEA2797679	PRJEB7446	Plains/Grant’s zebra	E. quagga boehmi	female	31.1466	55
ERS559438	SAMEA2802528	PRJEB7446	Hartmann’s mountain zebra	E. zebra hartmannae	female	25.2472	49
ERS559439	SAMEA2802529	PRJEB7446	Tibetan kiang	E. kiang	female	14.0353	66
ERS559440	SAMEA2802530	PRJEB7446	Onager	E. hemionus onager	male	29.3792	66
ERS559441	SAMEA2802531	PRJEB7446	Somali wild ass	E. africanus	female	38.2923	52
ERS559437	SAMEA3166710	PRJEB7446	Grevy’s/Imperial zebra	E. grevyi	female	25.6036	64
ERR868003	SAMEA3367609	PRJEB9267	Shetland Pony	E. caballus	female	22.9956	23
ERR953404	SAMEA3475186	PRJEB9799	American Miniature Horse	E. caballus	female	17.4388	19
ERR953411	SAMEA3475276	PRJEB9799	Percheron horse	E. caballus	female	19.4346	19
ERR953412	SAMEA3475296	PRJEB9799	Arabian	E. caballus	male	17.5363	15
ERR953413	SAMEA3475316	PRJEB9799	Tennessee Walking Horse	E. caballus	male	22.4744	15
ERS805734	SAMEA3498585	PRJEB10098	Przewalski Horse	E. przewalski	male	33.0667	23
ERR982786	SAMEA3504070	PRJEB9799	Native Mongolian Chakouyi Horse	E. caballus	male	14.6268	17
ERR982794	SAMEA3504078	PRJEB9799	Mangalarga Marchador Horse	E. caballus	male	16.804	8
ERR1397961	SAMEA3951219	PRJEB13863	Friesian dwarf	E. caballus	female	10.6972	22
ERR1397962	SAMEA3951220	PRJEB13863	Friesian dwarf	E. caballus	female	11.1374	22
ERR1397963	SAMEA3951221	PRJEB13863	Friesian dwarf	E. caballus	female	10.8432	25
ERR1527947	SAMEA4075241	PRJEB14779	Akhal-Teke	E. caballus	male	30.1608	25
ERR1527948	SAMEA4075242	PRJEB14779	Akhal-Teke	E. caballus	female	20.6583	18
ERR1527950	SAMEA4075244	PRJEB14779	Akhal-Teke	E. caballus	male	20.1356	21
ERR1527951	SAMEA4075245	PRJEB14779	Arabian	E. caballus	female	27.3839	23
ERR1527952	SAMEA4075246	PRJEB14779	Franches-Montagnes	E. caballus	female	22.6224	23
ERR1527958	SAMEA4075252	PRJEB14779	Franches-Montagnes	E. caballus	female	18.4605	20
ERR1527967	SAMEA4075261	PRJEB14779	Dutch Warmblood	E. caballus	male	11.7089	38
ERR1527969	SAMEA4075263	PRJEB14779	Quarter Horse	E. caballus	male	29.322	27
ERR1527970	SAMEA4075264	PRJEB14779	Quarter Horse	E. caballus	male	16.9692	25
ERR1527972	SAMEA4075266	PRJEB14779	Swiss Warmblood	E. caballus	female	11.7738	23
ERR1545181	SAMEA4351924	PRJEB14779	German WarmBlood	E. caballus	male	19.0371	25
ERR1545183	SAMEA4351926	PRJEB14779	German WarmBlood	E. caballus	male	18.4609	21
ERR1545188	SAMEA4351933	PRJEB14779	German WarmBlood	E. caballus	male	38.0264	25
ERR2731057	SAMEA4822840	PRJEB14779	Icelandic	E. caballus	male	26.9132	29
ERR2731058	SAMEA4822841	PRJEB14779	Holsteiner	E. caballus	female	28.1503	18
ERR2731060	SAMEA4822843	PRJEB14779	Holsteiner	E. caballus	female	21.2512	22
ERR2731061	SAMEA4822844	PRJEB14779	Holsteiner	E. caballus	female	9.94743	20
ERR3317814	SAMEA5600769	PRJEB14779	German Riding Pony	E. caballus	male	28.5073	26
ERR3628171	SAMEA6135894	PRJEB14779	Traber	E. caballus	male	34.1551	24
ERR3628173	SAMEA6135896	PRJEB14779	Traber	E. caballus	male	29.4552	15
SRR515206	SAMN01047698	PRJNA168142	Thoroughbred	E. caballus	male	14.3042	20
SRR515208	SAMN01047699	PRJNA168142	Thoroughbred	E. caballus	male	14.0879	16
SRR515213	SAMN01047703	PRJNA168142	Thoroughbred	E. caballus	male	13.5655	18
SRR515214	SAMN01047704	PRJNA168142	Thoroughbred	E. caballus	male	16.6408	21
SRR515215	SAMN01047705	PRJNA168142	Thoroughbred	E. caballus	male	17.8989	18
SRR515216	SAMN01047706	PRJNA168142	Thoroughbred	E. caballus	male	18.5681	23
SRR515217	SAMN01047707	PRJNA168142	Jejuma	E. caballus	male	14.2313	34
SRR515218	SAMN01047708	PRJNA168142	Jejuma	E. caballus	male	13.6482	19
SRR1048526	SAMN02422919	PRJNA230019	duelmener	E. caballus	female	15.1624	26
SRR1046129	SAMN02439777	PRJNA230019	Arabian	E. caballus	male	14.5415	24
SRR1046135	SAMN02439778	PRJNA230019	Sorraia	E. caballus	male	13.2429	18
SRR1046147	SAMN02439779	PRJNA230019	Hanoverian	E. caballus	male	26.9256	20
SRR1046151	SAMN02439782	PRJNA230019	Hanoverian	E. caballus	male	11.7443	26
SRR1564425	SAMN03009555	PRJNA233533	Przewalski Horse	E. przewalski	male	19.106	30
SRR1564427	SAMN03009556	PRJNA233533	Przewalski Horse	E. przewalski	female	26.0398	34
SRR1562345	SAMN03010637	PRJNA259601	Kulan	E. hemionus kulan	female	9.13629	76
SRR2142269	SAMN03952758	PRJNA291776	Hanoverian	E. caballus	male	12.2335	16
SRR2142313	SAMN03955413	PRJNA291776	Sorraia	E. caballus	female	13.5019	26
SRR3900339	SAMN04538176	PRJNA303134	Shetland Pony	E. caballus	male	22.7272	40
SRR3952018	SAMN05440129	PRJNA331853	Shetland pony	E. caballus	female	15.6119	21
SRR8698554	SAMN05589198	PRJNA526073	Lusitano	E. caballus	female	15.2784	16
SRR5131682	SAMN06017257	PRJNA357976	Lipizzan	E. caballus	male	20.0345	24
SRR5131683	SAMN06017258	PRJNA357976	Lipizzan	E. caballus	male	21.095	19
SRR5131680	SAMN06017259	PRJNA357976	Lipizzan	E. caballus	male	21.6195	14
SRR8698434	SAMN11086686	PRJNA526073	Shire	E. caballus	male	14.3335	15
SRR9912868	SAMN12240079	PRJNA553581	Thoroughbred	E. caballus	female	48.1277	24
SRR9912867	SAMN12240080	PRJNA553581	Thoroughbred	E. caballus	female	44.2626	22
SRR9912870	SAMN12240081	PRJNA553581	Thoroughbred	E. caballus	female	48.1423	19
SRR9912869	SAMN12240082	PRJNA553581	Thoroughbred	E. caballus	female	40.2751	31
SRR9912872	SAMN12240083	PRJNA553581	Thoroughbred	E. caballus	female	40.787	26
SRR9912871	SAMN12240084	PRJNA553581	Thoroughbred	E. caballus	female	47.7934	20
SRR9912874	SAMN12240085	PRJNA553581	Thoroughbred	E. caballus	female	48.9444	21
SRR9912873	SAMN12240086	PRJNA553581	Thoroughbred	E. caballus	female	40.1245	20
SRR9912866	SAMN12240087	PRJNA553581	Thoroughbred	E. caballus	female	48.7522	31
SRR9912865	SAMN12240088	PRJNA553581	Thoroughbred	E. caballus	female	38.0543	21
SRR9912878	SAMN12240089	PRJNA553581	Thoroughbred	E. caballus	female	47.9542	25
SRR9912876	SAMN12240091	PRJNA553581	Thoroughbred	E. caballus	female	18.8559	20
SRR9912875	SAMN12240092	PRJNA553581	Thoroughbred	E. caballus	female	39.4233	26
SRR9912879	SAMN12240095	PRJNA553581	Thoroughbred	E. caballus	female	33.5291	23
